# Supplementary material for: Machine learning in stream and river water temperature modeling: a review and metrics for evaluation
Source: Copernicus journal article supplement (doi:10.5194/hess-29-2521-2025), 2025-06-17
Supplement: Supplementary file 1 [file hess-29-2521-2025-supplement.pdf]

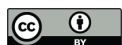

*Supplement of*

## **Machine learning in stream and river water temperature modeling: a review and metrics for evaluation**

**Claudia Rebecca Corona and Terri Sue Hogue**

*Correspondence to:* Claudia Rebecca Corona ([claudia.corona@mines.edu](mailto:claudia.corona@mines.edu))

The copyright of individual parts of the supplement might differ from the article licence.

**Table S1. Spatial/temporal data and parameters used by SWT studies, as reported. SWT = stream water temperature, ET = Evapotranspiration, PPT = Precipitation, AT = air temperature, DO = dissolved oxygen, DOY = day-of-year.**

| #  | Reference                          | Time period Considered                  | Region                                   | SWT Temporal Resolution | Spatial Scale     | Hydrometeorological Parameters (partial list)                                                                  | Evaluation Metrics Used                                                       |
|----|------------------------------------|-----------------------------------------|------------------------------------------|-------------------------|-------------------|----------------------------------------------------------------------------------------------------------------|-------------------------------------------------------------------------------|
| 1  | <b>Foreman et al., 2001</b>        | 1953–1999, May to October               | Fraser, Thompson River, Canada           | Hourly                  | Local/ Watershed  | SWT                                                                                                            | Slope, $R^2$ , RMSE (called RMSD), standard error                             |
| 2  | <b>Risley et al., 2003</b>         | 1999, June to September                 | west Oregon (U.S)                        | Hourly                  | Regional          | SWT, riparian shade, elevation, % forested                                                                     | $R^2$ , RMSE                                                                  |
| 3  | <b>Sivri et al., 2007</b>          | 2001–2002                               | Province of Rize, NE Turkey              | Daily                   | Local / Watershed | Daily SWT, monthly mean AT, PPT, water quality parameters (DO, ph, etc.)                                       | $R^2$ , Sum of Squares Error (SSE)                                            |
| 4  | <b>Tao et al., 2008</b>            | 1986–2003                               | Yellow River, China                      | Daily                   | Local / Watershed | AT, water level, channel storage, discharge                                                                    | $R^2$                                                                         |
| 5  | <b>Chenard and Caissie, 2008</b>   | 10 years: 1992–2002                     | Miramichi River, Canada                  | Daily                   | Local / Watershed | Hourly water level, Daily AT, Hourly SWT                                                                       | RMSE, PBIAS, $R^2$                                                            |
| 6  | <b>Sahoo et al., 2009</b>          | 1997–2003 (varied by station)           | Lake Tahoe watershed                     | Daily                   | Regional          | AT, short-wave radiation                                                                                       | Mean error (E), $r$ , RMSE. MSE for training error.                           |
| 7  | <b>St-Hilaire et al., 2012</b>     | 5 years: 1993–1998,                     | Moisie River, Quebec, Canada             | Daily                   | Local / Watershed | AT, stream discharge                                                                                           | RMSE, relative bias (RB), NSE (called NTD)                                    |
| 8  | <b>Hong and Bhamidimarri, 2012</b> | Dec 2001–April 2002                     | Waikato River, New Zealand               | 10-min interval         | Local / Watershed | AT, barometric pressure, wind direction/speed, solar radiation, SWT, humidity, water level                     | RMSE, MSE                                                                     |
| 9  | <b>Grbic et al., 2013</b>          | 5 years: 1993–1998                      | Drava river, Croatia                     | Daily                   | Local / Watershed | SWT, Daily mean AT, Daily mean discharge                                                                       | NSE (called NSC), RMSE, MAE                                                   |
| 10 | <b>Hebert et al., 2014</b>         | 9 years: 1998–2007, April–October       | Miramichi River, Canada                  | Hourly                  | Local / Watershed | AT, SWT, daily mean discharge                                                                                  | RMSE, $R^2$ , PBIAS                                                           |
| 11 | <b>DeWeber and Wagner, 2014</b>    | 19 years, 1980–2010: May–October        | Eastern US                               | Daily                   | Regional          | AT, landform attributes, and forested land cover                                                               | RMSE, NSE, RMSE/SD, PBIAS                                                     |
| 12 | <b>Cole et al., 2014</b>           | 99 years: 1913–2012 (varied by station) | Delaware river                           | Daily                   | Local / Watershed | AT, wind speed, solar radiation, barometric pressure, dew point temp., relative humidity, sky cover, daily PPT | RMSE, NSE, PBIAS, Willmott index of agreement ( $d$ )                         |
| 13 | <b>Hadzima-Nyarko et al. 2014</b>  | 19 years: 1991–2010                     | Drava river, Croatia.                    | Daily                   | Local / Watershed | Daily mean AT, SWT                                                                                             | RMSE, normalized RMSE %, $r$ , NSE, NSE-A: adjusted coefficient of efficiency |
| 14 | <b>Piotrowski et al., 2015</b>     | 17 years: 11/01/1990–10/31/2000         | Tarnowska, Spurasl, Biana Rivers, Poland | Daily                   | Local / Watershed | AT, sun declination                                                                                            | MSE                                                                           |
| 15 | <b>Rabi et al., 2015</b>           | 19 years: 1991–2010                     | Drava river, Croatia.                    | Daily                   | Local / Watershed | Daily mean AT data, Daily SWT data                                                                             | RMSE, RMSE %, $r$ , NSE, NSE-A                                                |

|    |                                                 |                                          |                                                                      |                                 |                   |                                                                           |                                    |
|----|-------------------------------------------------|------------------------------------------|----------------------------------------------------------------------|---------------------------------|-------------------|---------------------------------------------------------------------------|------------------------------------|
| 16 | <b>Jeong et al., 2016</b>                       | 18 years: 1991–2009                      | Soyang river, South Korea                                            | Hourly                          | Local / Watershed | Hourly air temp., hourly SWT, hourly rainfall, wind speed, wind direction | RMSE, NSE (called NASH), $r$ , $d$ |
| 17 | <b>Kwak et al., 2016</b>                        | 3 years: 2011–2014, Summer               | Fourche River, Quebec, Canada                                        | Hourly data aggregated to Daily | Local / Watershed | SWT, AT, solar radiation, relative humidity, wind speed                   | RMSE, PBIAS, NSE                   |
| 18 | <b>Laanaya et al., 2017</b>                     | 10 years: 2005–2015, (varied by station) | Sainte-Marguerite River, Canada                                      | Hourly data aggregated to Daily | Local / Watershed | SWT, AT and stream discharge                                              | RMSE, PBIAS, NSE (called NSC)      |
| 19 | <b>Liu et al., 2018</b>                         | 7 years: 2007–2014                       | Eel River, Coastal CA                                                | Daily                           | Regional          | AT, SWT                                                                   | NSE, $R^2$ , RMSE (for ANN model)  |
| 20 | <b>Voza and Vukovic, 2018</b>                   | 10 years: 2005–2015                      | Morava River, Serbia                                                 | Monthly                         | Regional          | SWT, water quality param. (DO, pH, etc.)                                  | $R^2$ , Spearman's $\rho$          |
| 21 | <b>Temizyurek and Dadaser-Celik, 2018</b>       | 12 years: 1995–2007                      | Kizilirmak river, Turkey                                             | Monthly                         | Local / Watershed | AT, wind speed, relative humidity, SWTs                                   | $R^2$ , RMSE                       |
| 22 | <b>Graf et al., 2019</b>                        | 39 years: 1984–2013                      | Warta River, Poland                                                  | Daily                           | Regional          | AT, SWT                                                                   | $R^2$ , RMSE, MAE                  |
| 23 | <b>Zhu, Heddam, Nyarko et al., 2019</b>         | 32 years: 1984–2016, (varies by station) | Drava River, Croatia; Dischmaback, Mentue, Rhone rivers, Switzerland | Daily                           | Local / Watershed | AT, discharge, and components of the Gregorian calendar                   | $r$ , $d$ , RMSE, MAE              |
| 24 | <b>Zhu, Heddam, Wu et al., 2019</b>             | 16 years: 2001–2017 (varies by station)  | Cedar River (WA), Fanno Creek (OR), Irondequoit Creek (NY)           | Daily                           | Local / Watershed | AT, discharge, and DOY                                                    | $r$ , $d$ , RMSE, MAE              |
| 25 | <b>Zhu, Hadzima-Nyarko, Gao et al., 2019</b>    | 26 years: 1991–2017 (varies by station)  | Drava river, Croatia.                                                | Daily                           | Local / Watershed | Daily SWT, AT                                                             | $r$ , $d$ , RMSE, MAE              |
| 26 | <b>Zhu, Nyarko, Hadzima-Nyarko et al., 2019</b> | 26 years: 1991–2017 (varies by station)  | Drava river, Croatia; 3 rivers in Switzerland; 3 rivers in U.S.      | Daily                           | Local / Watershed | AT, discharge, DOY                                                        | $r$ , $d$ , RMSE, MAE              |
| 27 | <b>Zhu and Heddam, 2019</b>                     | 16 years: 2001–2017 (varies by station)  | Cedar (WA), Fanno (OR), Irondequoit Creek (NY)                       | Daily                           | Local / Watershed | AT, discharge, DOY                                                        | $r$ , $d$ , RMSE, MAE              |
| 28 | <b>Lu and Ma, 2020</b>                          | May–July 2019                            | Tualatin River, Oregon, U.S.                                         | Hourly                          | Local / Watershed | AT, SWT, water quality parameters (DO, pH, etc.)                          | MAE, RMSE, MAPE, RMSPE, U1, U2     |
| 29 | <b>Qiu et al., 2020</b>                         | 28 years: 1977–1987, 1993–2011           | Yangtze River, China                                                 | Daily                           | Regional          | AT, discharge, DOY                                                        | MAE, RMSE, NSE, $R^2$              |
| 30 | <b>Krishnaraj &amp; Deka, 2020</b>              | 12 years: 2005–2017                      | Ganga River Basin, India                                             | Monthly                         | Local / Watershed | 20 parameters see Table 1, includes: SWT                                  | Spearman's $\rho$                  |
| 31 | <b>Rahmani et al., 2020</b>                     | 4 years: 2010–2014                       | 118 basins in CONUS, no                                              | Daily                           | Point-scale       | SWT, discharge                                                            | RMSE, median RMSE, PBIAS,          |

|    |                                   |                               |                                                     |                                  |                          |                                                                                                                                                                         |                                                      |
|----|-----------------------------------|-------------------------------|-----------------------------------------------------|----------------------------------|--------------------------|-------------------------------------------------------------------------------------------------------------------------------------------------------------------------|------------------------------------------------------|
|    |                                   |                               | dams                                                |                                  | across CONUS             |                                                                                                                                                                         | NSE                                                  |
| 32 | <b>Feigl et al., 2021</b>         | 1977–2015 (varied by station) | Ten Austrian catchments                             | Daily                            | Regional                 | Daily mean/max/min AT, runoff, PPT, and global radiation.                                                                                                               | MSE, MAE, RMSE                                       |
| 33 | <b>Piotrowski et al., 2021</b>    | 46 years: 1971–2017           | 3 from NW U.S., 2 from Poland                       | Daily                            | Local / Watershed        | AT and discharge                                                                                                                                                        | MSE, NSE (called NSC), AIC, BIC                      |
| 34 | <b>Abdi et al., 2021</b>          | June 10–July 18, 2016         | Los Angeles river, CA, U.S.                         | Hourly                           | Local / Watershed        | AT, relative humidity, wind speed, barometric pressure                                                                                                                  | MAE, RMSE, $R^2$                                     |
| 35 | <b>Graf and Aghelpour, 2021</b>   | 20 years: 11/1989–11/2009     | Warta River, Poland                                 | Daily                            | Regional                 | Time lag in SWT                                                                                                                                                         | $R^2$ , RMSE, Normalized RMSE, MAE, NSE (called NS). |
| 36 | <b>Rajesh and Rehana, 2021</b>    | 1989–2014                     | Tunga-Bhadra river, Shimoga Station, India          | Daily, also monthly, seasonal    | Local/ Watershed         | AT (avg./max/min), SWT                                                                                                                                                  | $R^2$ , MSE, RMSE, RSR, NSE, MAE, KGE                |
| 37 | <b>Rahmani et al., 2021</b>       | 6 years: 2010–2016            | 455 stations across the CONUS, includes dams        | Daily                            | Point-scale across CONUS | Mean daily discharge, SWT, meteorologic forcing data (min and max daily AT, precip., Solar radiation, vapour pressure and day length), and various watershed attributes | RMSE, bias, unbiased RMSE (ubRMSE), $r$ , and NSE    |
| 38 | <b>Heddiam, Kim et al., 2022</b>  | 53 years: 1961–2014           | Orda river, many stations, Poland                   | Daily                            | Regional                 | AT, DOY                                                                                                                                                                 | RMSE, MAE, NSE, $r$                                  |
| 39 | <b>Jiang et al., 2022</b>         | 3 years: 2015–2018            | Jinsha River Basin                                  | Daily                            | Regional                 | Daily avg./max/min AT, dew temp., discharge, DOY, wind speed, PPT.                                                                                                      | RMSE, $R^2$ , NSE                                    |
| 40 | <b>Sadler et al., 2022</b>        | 34 years: 1980–2014           | CONUS                                               | Daily                            | Point-scale across CONUS | Daylight, PPT, short-wave radiation, snow-water equivalent, AT, vapor pressure                                                                                          | NSE, t-scores of the NSEs                            |
| 41 | <b>Weierbach et al., 2022</b>     | 40 years: 1980–2020           | Mid-Atlantic, Pacific NW catchments                 | Monthly                          | Regional                 | AT, solar radiation, discharge, month of year, drainage area and dam info                                                                                               | RMSE, MAE, NSE, PBIAS                                |
| 42 | <b>Zanoni et al., 2022</b>        | 20 years: 1994–2014           | Adige river, NE Italy                               | Daily                            | Regional                 | SWT, and other water quality parameters (As, Cl, DO, etc.)                                                                                                              | PBIAS, NSE, RMSE, KGE                                |
| 43 | <b>Heddiam, Ptak et al., 2022</b> | 27 years: 1987 - 2014         | Kaczawa, Krzna, Orla, Wieprz, Nida, stations Poland | Daily                            | Regional                 | SWT, mean AT, DOY                                                                                                                                                       | RMSE, MAE, NSE, $R^2$                                |
| 44 | <b>Hani et al., 2023</b>          | 2020, 2021: Summer months     | Sainte-Marguerite River, Canada                     | Hourly                           | Local                    | Discharge, AT, SWT,                                                                                                                                                     | Mean, Median, SD, RMSE, r-RMSE, NSE, PBIAS, r-Bias   |
| 45 | <b>Khosravi et al., 2023</b>      | 21 years: 2006–2022           | Delaware River, New Jersey, U.S.                    | Varied due to different duration | Local / Watershed        | SWT, discharge, water level, DO, turbidity, pH, specific conductance                                                                                                    | RMSE, $R^2$ , NSE (for loss function)                |

|    |                                   |                                           |                                                       |               |                    |                                                                                                                                                                    |                                                           |
|----|-----------------------------------|-------------------------------------------|-------------------------------------------------------|---------------|--------------------|--------------------------------------------------------------------------------------------------------------------------------------------------------------------|-----------------------------------------------------------|
| 46 | <b>Topp et al., 2023</b>          | 42 years: 1980–2022                       | Delaware River Basin (DRB), U.S.                      | Daily         | Regional           | AT, PPT, shortwave radiation, potential ET, stream width, slope, elevation                                                                                         | RMSE, NSE, bias                                           |
| 47 | <b>Rehana and Rajesh, 2023</b>    | 37 years: 1980–2017 (varies by station)   | India: 7 catchments                                   | Monthly       | Regional           | Monthly min. and max AT, SWT                                                                                                                                       | NSE, KGE, RSR, RMSE, MAE.                                 |
| 48 | <b>Siegel et al., 2023</b>        | 33 years: 1990 - 2023                     | Pacific Northwest                                     | Daily         | Regional           | SWT, Daily mean AT, daily modeled snow-pack data SWE, daily discharge                                                                                              | RMSE, MAE                                                 |
| 49 | <b>Wade et al., 2023</b>          | 4 years: 2016–2020                        | CONUS                                                 | Monthly       | Point-scale, CONUS | 23 variables, includes: AT, monthly PPT, discharge                                                                                                                 | RMSE normalized, $R^2$                                    |
| 50 | <b>Souaissi et al., 2023</b>      | 15 years, 1960s–2023: May–Oct.            | 24 river temp. stations, Switzerland                  | Monthly       | Regional           | 14 variables include: catchment area, mean elevation, stream length, max annual AT, summer PPT                                                                     | $r$ , $R^2$ , BIAS, RMSE, RRMSE: area, mean, etc.         |
| 51 | <b>Drainas et al., 2023</b>       | 1–41 years, 1980–2021 (varied by station) | 16 headwater streams, Bavaria, Germany                | Daily         | Regional           | AT, DOY, discharge, water level and sunshine per day                                                                                                               | RMSE, $r$ , PBIAS                                         |
| 52 | <b>Rozos, 2023</b>                | 1992–2014 (varied by station)             | Arno River, Sieve River (Italy), Bakas River (Greece) | Daily, Hourly | Local / Watershed  | Mean Areal Daily rainfall, ET, discharge, average annual rainfall/PPT                                                                                              | MSE, PBIAS                                                |
| 53 | <b>Rahmani et al., 2023</b>       | 6 years: 2010–2016                        | CONUS, (GAGES-II)                                     | Daily         | CONUS              | 33 attributes including AT, SWT, DOY, etc.                                                                                                                         | PBIAS, NSE, KGE, RMSE (loss function, error minimization) |
| 54 | <b>Zwart, Oliver, et al. 2023</b> | 36 years: 1985–2021                       | Delaware River Basin, upper                           | Daily         | Regional           | 5 drivers: grid MET daily min and max AT, daily average downward shortwave radiation, NWIS daily avg. reservoirs release rate, observations of yesterday's max SWT | RMSE, BIAS, Continuous Ranked Probability Score (CRPS)    |
| 55 | <b>Zwart, Diaz, et al., 2023</b>  | 38 years: 1982–2020                       | Delaware River Basin, upper                           | Daily         | Regional           | Sub-daily observations of SWT, gridMET daily min AT, relative humidity, daily mean downward shortwave radiation, wind speed, daily max AT, daily accumulated PPT   | RMSE, BIAS, Continuous Ranked Probability Score (CRPS)    |
| 56 | <b>He et al., 2024</b>            | 40 years: 1980–2020                       | Delaware River (NJ), Houston River (Texas)            | Daily         | Regional           | Discharge, SWT, AT                                                                                                                                                 | RMSE, NSE                                                 |
| 57 | <b>Majerska et al., 2024</b>      | 10 years: 2012–2022, June to September    | Fuglebekken stream, Svalbard, Norway                  | Daily         | Local/ Watershed   | SWT, water level, ground temperature, radiation                                                                                                                    | KGE                                                       |

**5 Table S2. Data analysis techniques and/or ML algorithms used by studies. Reported training/calibration/validation included directly from studies.**

| #  | Reference                          | Data Analysis Technique OR ML Algorithms Used                                                                                                                                       | Training (Zhu et al. 2019 studies label it as “calibration”), validation, testing          |
|----|------------------------------------|-------------------------------------------------------------------------------------------------------------------------------------------------------------------------------------|--------------------------------------------------------------------------------------------|
| 1  | <b>Foreman et al., 2001</b>        | Linear regression and neural networks (NNs)                                                                                                                                         | 4 years, 1995–1998, training, 21 years, 1953–1994 validation                               |
| 2  | <b>Risley et al., 2003</b>         | Feed-forward NN, three sets of NN models                                                                                                                                            | 33 % training, 67 % testing. Six of 148 streams randomly removed, used for validation.     |
| 3  | <b>Sivri et al., 2007</b>          | Multi-Layer Perceptron (MLPNN)                                                                                                                                                      | 2001: training, 2002: testing                                                              |
| 4  | <b>Tao et al., 2008</b>            | Back-propagation Neural network (BPNN)                                                                                                                                              | 14 years, 1986–1999, training, 4 years, 2000–2003, testing                                 |
| 5  | <b>Chenard and Caissie, 2008</b>   | MLPNNs models w/ variety of input parameters: 4 predict mean daily SWT and 4 predicted max daily SWT                                                                                | Training: 5 years, Testing: 2 years, Validation: 4 years                                   |
| 6  | <b>Sahoo et al., 2009</b>          | NN, statistical model (multiple regression analysis (MRA), and chaotic non-linear dynamic algorithms (CNDA).                                                                        | Training, validation: 3 years, 1999–2001<br>Testing: 1 year, 2002                          |
| 7  | <b>St-Hilaire et al., 2012</b>     | K-nearest neighbor (K-nn)                                                                                                                                                           | “The relatively small sample size precluded us from performing a split sample validation”. |
| 8  | <b>Hong and Bhamidimarri, 2012</b> | Two DNFLMS modes: (1) online one-pass clustering, extended Kalman filtering algorithm (mode 1); and (2) extended Kalman filtering with BP algorithm trained to MSE.                 | Training 2.5 months, testing 1.5 months                                                    |
| 9  | <b>Grbic et al., 2013</b>          | Combination of Gaussian process regression (GPR) models                                                                                                                             | Training: 4 years, 1993–1996<br>Testing: 2 years, 1997–1998                                |
| 10 | <b>Hebert et al., 2014</b>         | NN                                                                                                                                                                                  | Training: 4 years, 1998–2002<br>Validation: 5 years, 2003–2007                             |
| 11 | <b>DeWeber and Wagner, 2014</b>    | Four variations of FFNN models                                                                                                                                                      | 90 % training, 10 % validation, 2010 used as testing year                                  |
| 12 | <b>Cole et al., 2014</b>           | Generalized Least Squares w/ cosine (GLScos), AutoRegressive Integrated Moving Average (ARIMA), NN                                                                                  | Training: 4 years, 2008–2011, tested: 1 year, 2012                                         |
| 13 | <b>Hadzima-Nyarko et al. 2014</b>  | MLPNN and a radial basis function network (RBFNN)                                                                                                                                   | 80 % training, 20 % testing                                                                |
| 14 | <b>Piotrowski et al., 2015</b>     | MLPNN, product-unit NN, wavelet NN, adaptive-network-based fuzzy inference systems (ANFIS) and K-nn                                                                                 | Two sites training/validation/testing: 41/24/35, 40/30/30                                  |
| 15 | <b>Rabi et al., 2015</b>           | Six different MLPNNs                                                                                                                                                                | 80 % training, 20 % testing                                                                |
| 16 | <b>Jeong et al., 2016</b>          | FFNN                                                                                                                                                                                | Not Available                                                                              |
| 17 | <b>Kwak et al., 2016</b>           | (a) Deterministic model CEQUEAU; (b) ARMAX (AutoRegressive-Moving Average with eXogenous terms) stochastic model; and (c) NARX (Nonlinear AutoRegressive model w/ eXogenous input). | 75 % of data for training/calibration and 25 % of data for validation                      |
| 18 | <b>Laanaya et al., 2017</b>        | Generalized Additive Model (GAM), Logistic Model (LM), Residuals regression model (RRM), and Linear regression model (LRM)                                                          | Not explicitly stated                                                                      |
| 19 | <b>Liu et al., 2018</b>            | Integrated model of NN and VIC (not ML)                                                                                                                                             | 1.5 – 5 years (calibration), 0.75 – 2 years (validation)                                   |

|    |                                                 |                                                                                                                                                                                                                |                                                                                                                                                                                        |
|----|-------------------------------------------------|----------------------------------------------------------------------------------------------------------------------------------------------------------------------------------------------------------------|----------------------------------------------------------------------------------------------------------------------------------------------------------------------------------------|
| 20 | <b>Voza and Vukovic, 2018</b>                   | MLPNN                                                                                                                                                                                                          | Not explicitly stated                                                                                                                                                                  |
| 21 | <b>Temizyurek and Dadaser-Celik, 2018</b>       | NN                                                                                                                                                                                                             | 50 % training, 25 % testing, and 25 % used as holdout                                                                                                                                  |
| 22 | <b>Graf et al., 2019</b>                        | Wavelet Transform (WT) and NN hybrid model, using 4 mother wavelets: Daubechies, Symlet, discrete Meyer, and Haar. Tested against MLPNN.                                                                       | Stations used for:<br>Training (4 of 9), testing (3 of 9), validation (2 of 9)                                                                                                         |
| 23 | <b>Zhu, Heddham, Nyarko et al., 2019</b>        | 4 ML models: (MLPNN) and (ANFIS) – w/ fuzzy c-mean clustering (ANFIS_FC), ANFIS w/ grid partition (ANFIS_GP), and ANFIS w/ subtractive clustering method (ANFIS_SC),                                           | Varied by station:<br>Training data: 6–20 years, ~ 67–73 %,<br>Validation data: 3–10 years, 27–33 %                                                                                    |
| 24 | <b>Zhu, Heddham, Wu et al., 2019</b>            | Extreme learning machine (ELM), MLPNN and MLR models.                                                                                                                                                          | Training data: 8–11 years, ~70–75 %,<br>Validation data: 3–4 years, ~20–25 %                                                                                                           |
| 25 | <b>Zhu, Hadzima-Nyarko, Gao et al., 2019</b>    | Hybrid models combining WT and NN (WTNN) and WT with ANFIS (WTANFIS), NN, ANFIS                                                                                                                                | Calibration/training: Botovo, 1991–2008, ~17 years (~70% train.). Donji 1993–2008, 15 years (~68% train.).<br>Validation: 2009–2016, 7 years for Botovo (~30% val.), Donji (~32% val.) |
| 26 | <b>Zhu, Nyarko, Hadzima-Nyarko et al., 2019</b> | (FFNN), (GPR), and (DT) models                                                                                                                                                                                 | Varied by station:<br>training data: 6–20 years, ~ 67–73 %,<br>validation: 3–10 years, ~ 27–33 %                                                                                       |
| 27 | <b>Zhu and Heddham, 2019</b>                    | Optimally pruned extreme learning machine (OPELM) and RBFNN                                                                                                                                                    | Training data: 8–11 years, ~ 70–75 %,<br>Validation data: 3–4 years, ~ 20–25 %                                                                                                         |
| 28 | <b>Lu and Ma, 2020</b>                          | Extreme gradient boosting (XGBoost) and random forest (RF)                                                                                                                                                     | Training/testing: 9:1 ratio                                                                                                                                                            |
| 29 | <b>Qiu et al., 2020</b>                         | BP_PSO model variations, based on BPNN (back propagation NN) optimized by PSO (particle swarm optimization) algorithm.                                                                                         | Cuntan: 13/17 years = 76.5 % (training), 4/17 years = 24.5 % (testing),<br>Datong: 7/9 years = 78 % (training), 2/9 years= 22 % testing                                                |
| 30 | <b>Krishnaraj and Deka, 2020</b>                | k-means cluster analysis (CA), principal component analysis (PCA) and correlation                                                                                                                              | Not explicitly stated                                                                                                                                                                  |
| 31 | <b>Rahmani et al., 2020</b>                     | LSTM                                                                                                                                                                                                           | 4 years, 67 %, training<br>2 years, 33 % testing                                                                                                                                       |
| 32 | <b>Feigl et al., 2021</b>                       | Step-wise linear regression, RF, XGBoost, FFNNs, 2 (RNNs): LSTM and recurrent gated unit (GRU)                                                                                                                 | 60 % training, 20 % validation, 20 % testing                                                                                                                                           |
| 33 | <b>Piotrowski et al., 2021</b>                  | MLPNNs, PUNN, extended logistic regression and air2stream (not ML)                                                                                                                                             | 67 % training, 33 % validation                                                                                                                                                         |
| 34 | <b>Abdi et al., 2021</b>                        | Four models: single-layer (SLR), multilayer linear regression (MLR) and SLR and MLR-NN                                                                                                                         | 80 % training, validation, and 20 % testing                                                                                                                                            |
| 35 | <b>Graf and Aghelpour, 2021</b>                 | Autoregressive (AR), Moving Average (MA), Autoregressive Moving Average (ARMA). Autoregressive Integrated Moving Average (ARIMA), ANFIS, Radial Basis Function (RBF) and Group Method of Data Handling (GMDH). | 75 % training, 25 % testing                                                                                                                                                            |
| 36 | <b>Rajesh and Rehana, 2021</b>                  | ML models - Ridge regression (RR), K-nn, Random forest, and SVR                                                                                                                                                | Not explicitly stated, cross-validation mentioned.                                                                                                                                     |
| 37 | <b>Rahmani et al., 2021</b>                     | LSTM models                                                                                                                                                                                                    | Training: 10/01/2010 - 09/30/2014 (~67%)<br>Testing: 10/01/2014 - 09/30/2016 (~33%)                                                                                                    |
| 38 | <b>Heddham, Ptak et al., 2022</b>               | K-nn, least square support vector machine (LSSVM), generalized regression (GRNN), cascade correlation artificial (CCNN), relevance vector machine (RVM), and locally weighted polynomials regression (LWPR).   | 70 % training, 30 % testing                                                                                                                                                            |

|    |                                          |                                                                                                                                   |                                                                                                                                        |
|----|------------------------------------------|-----------------------------------------------------------------------------------------------------------------------------------|----------------------------------------------------------------------------------------------------------------------------------------|
| 39 | <b>Jiang et al., 2022</b>                | Decision trees (DT), RF, gradient boosting (GB), adaptive boosting (AB), SVR, MLPNN                                               | 60 % training, 40% testing                                                                                                             |
| 40 | <b>Sadler et al., 2022</b>               | LSTM                                                                                                                              | Years splits (Training/validation/testing): Exp. A, (25/4/4), Exp. B, (25/4/4), Exp. C, (2/4/4), Exp. D performance testing (31, 1, 1) |
| 41 | <b>Weierbach et al., 2022</b>            | SVR and XGBoost                                                                                                                   | 70 % training, 30 % testing                                                                                                            |
| 42 | <b>Zanoni et al., 2022</b>               | RF and FFNN, linear regression model                                                                                              | 70 % training, 30 % testing                                                                                                            |
| 43 | <b>Heddam, Kim et al., 2022</b>          | Bat algorithm optimized extreme learning machines ELM (Bat-ELM), (MLPNN), (CART) and (MLR).                                       | 70 % training, 30 % validation                                                                                                         |
| 44 | <b>Hani et al., 2023</b>                 | Multivariate adaptive splines regression (MARS), generalized additive model (GAM), support vector machine (SVM), and (RF)         | Not explicitly stated                                                                                                                  |
| 45 | <b>Khosravi et al., 2023</b>             | LSTM                                                                                                                              | Roughly 70 % training, 30 % validation, not explicitly stated                                                                          |
| 46 | <b>Topp et al., 2023</b>                 | Process-guided deep learning (PGDL): Recurrent graph convolution network (RGCN), temporal convolution graph model (Graph WaveNet) | Two scenarios: Temp. shift 10/5/25 Drought 25/5/10                                                                                     |
| 47 | <b>Rehana and Rajesh, 2023</b>           | LSTM, integrated w/ k-NN bootstrap resampling (k-NN + LSTM), WT-LSTM. Air2stream (not ML)                                         | ~77–89 % training, ~11–23 % testing (in years): 18/4; 10/3; 24/3; 8/2; 11/2; 24/3; 11/3.                                               |
| 48 | <b>Siegel et al., 2023</b>               | Generalized Additive Model (GAM)                                                                                                  | leave-one-year-out cross validation; leave-one-region-out cross-validation                                                             |
| 49 | <b>Wade, Kelleher &amp; Hannah, 2023</b> | RF                                                                                                                                | 80 % training, 20 % testing                                                                                                            |
| 50 | <b>Souaissi et al., 2023</b>             | RF, XGBoost, w/ non-parametric MARS and GAM.                                                                                      | Not explicitly stated                                                                                                                  |
| 51 | <b>Drainas et al., 2023</b>              | NN                                                                                                                                | 90 % training, 10 % testing                                                                                                            |
| 52 | <b>Rozos, 2023</b>                       | RNN w/ LSTM, K-nn w/ Bluecat                                                                                                      | 70 % training, 30 % testing                                                                                                            |
| 53 | <b>Rahmani et al., 2023</b>              | LSTM, SN-TEMP (process-based model)                                                                                               | 67 % training (4 years), 33 % testing (2 years)                                                                                        |
| 54 | <b>Zwart, Oliver, et al. 2023</b>        | LSTM                                                                                                                              | Varied, not explicitly stated                                                                                                          |
| 55 | <b>Zwart, Diaz, et al., 2023</b>         | LSTM, RGCN                                                                                                                        | Year splits (Training/validation/testing): 1982-2020 / 2019 / 04-2021 to 09-2022                                                       |
| 56 | <b>He et al., 2024</b>                   | LSTM+GNN                                                                                                                          | 67 % training, 33 % validation                                                                                                         |
| 57 | <b>Majerska et al., 2024</b>             | GPR                                                                                                                               | Five-fold cross-validation; unclear % training vs % testing/validation                                                                 |
